# Supplementary material for: A resilience group training program for people with multiple sclerosis: Results of a pilot single-blind randomized controlled trial and nested qualitative study
Source: PubMed Central journal article supplement (PMC7145197; doi:10.1371/journal.pone.0231380), 2020-04-09

# S6 Appendix - Graphic plots for repeated measure analysis

### MSQOL – 54 MHC

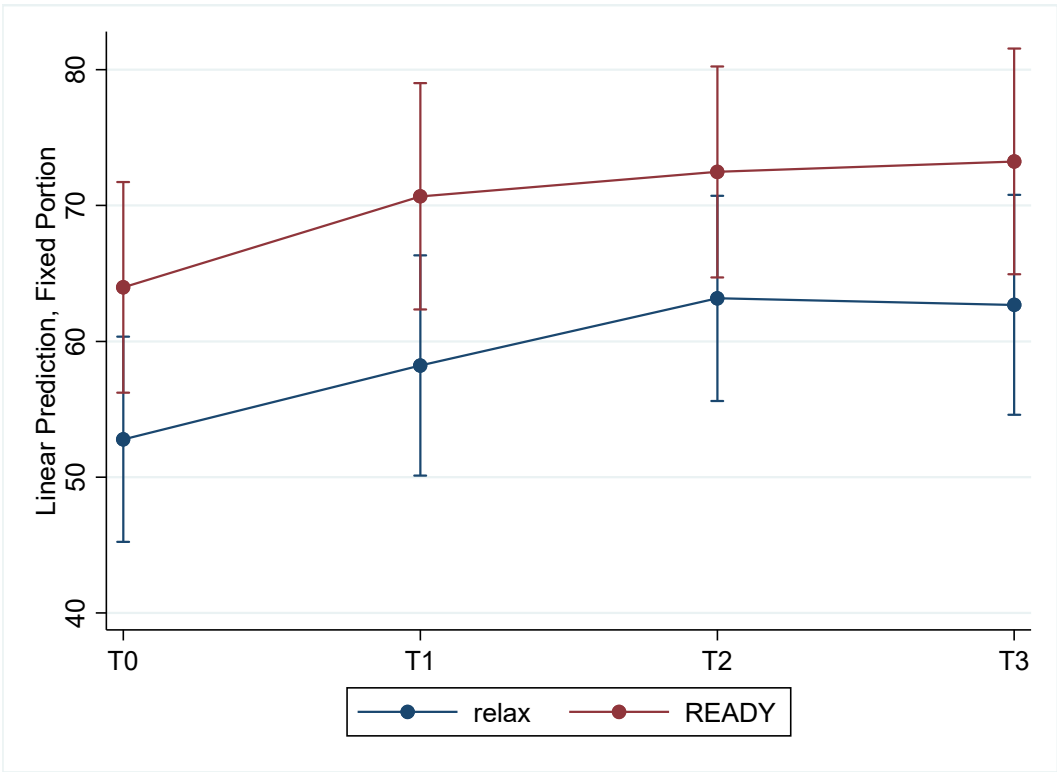

### MSQOL – 54 PHC

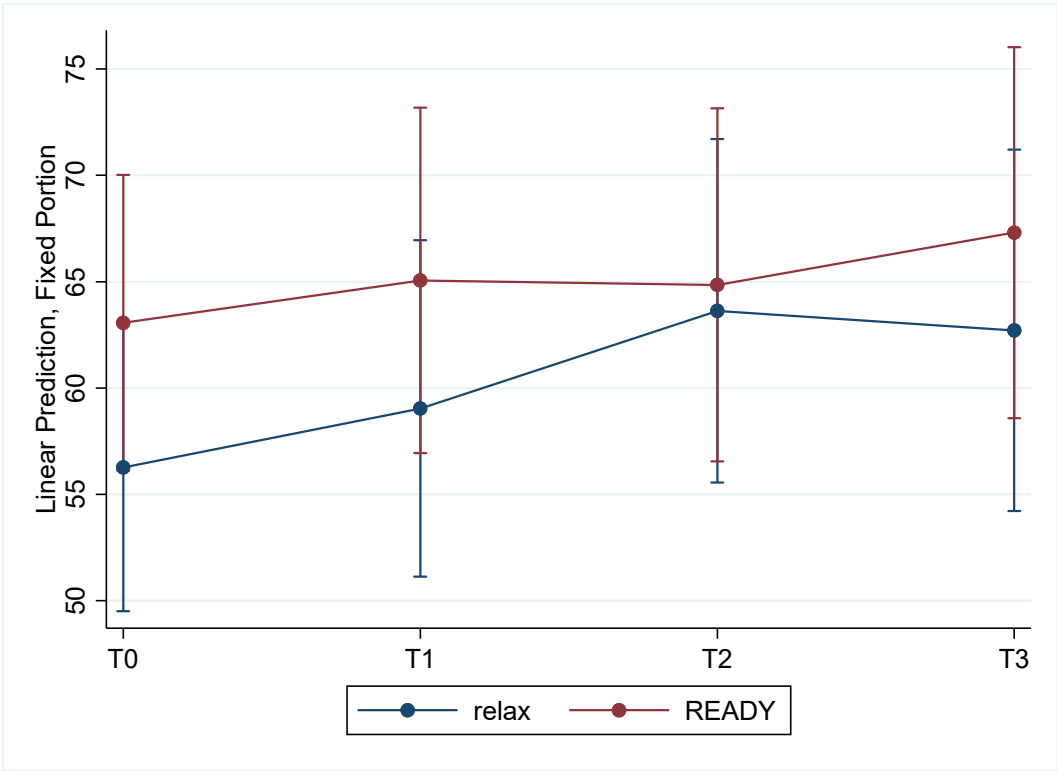

### PSS

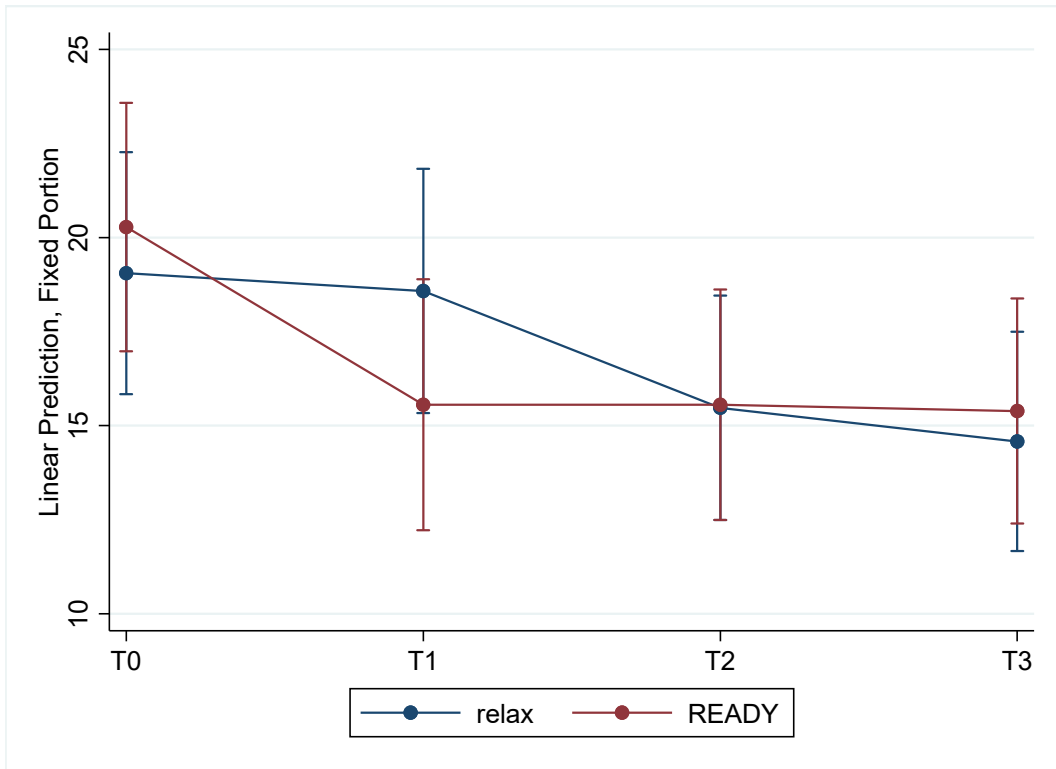

### CD-RISC

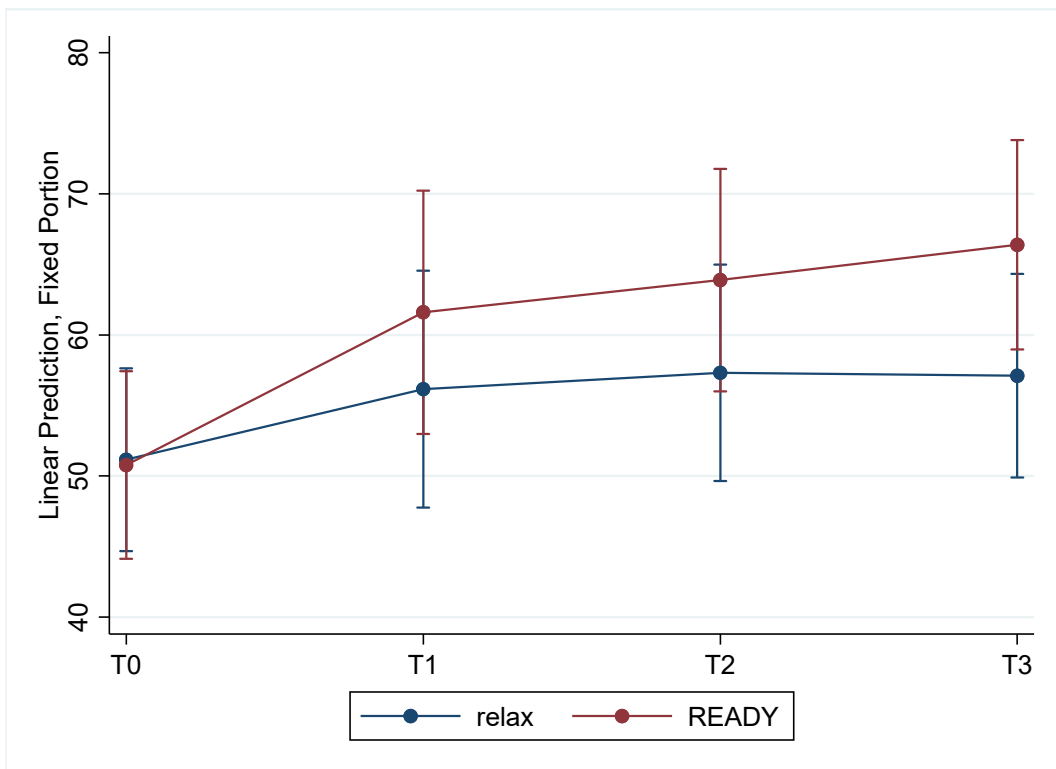

### HADS-Anxiety

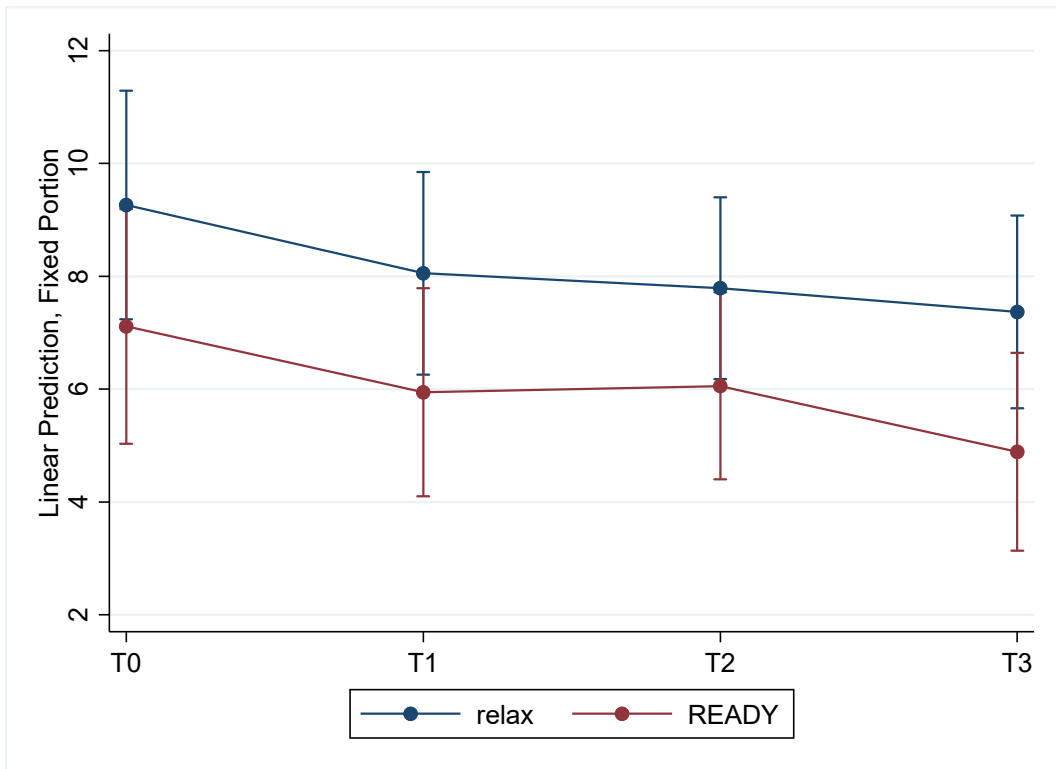

### HADS-Depression

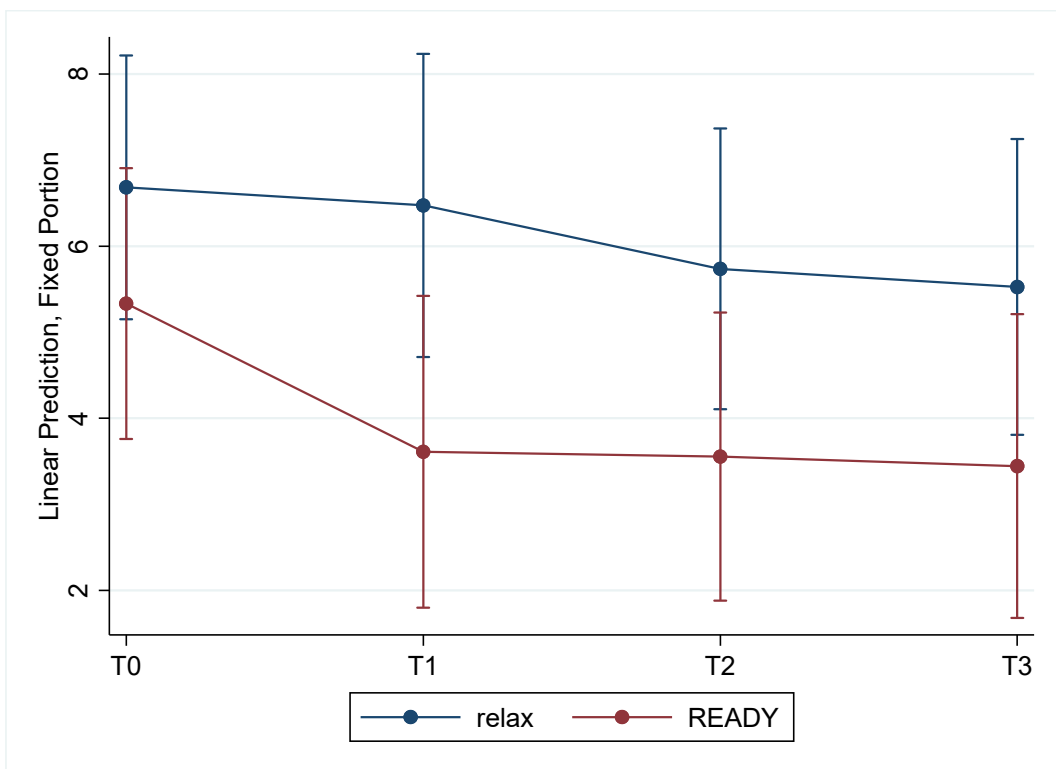

### CompACT Total score

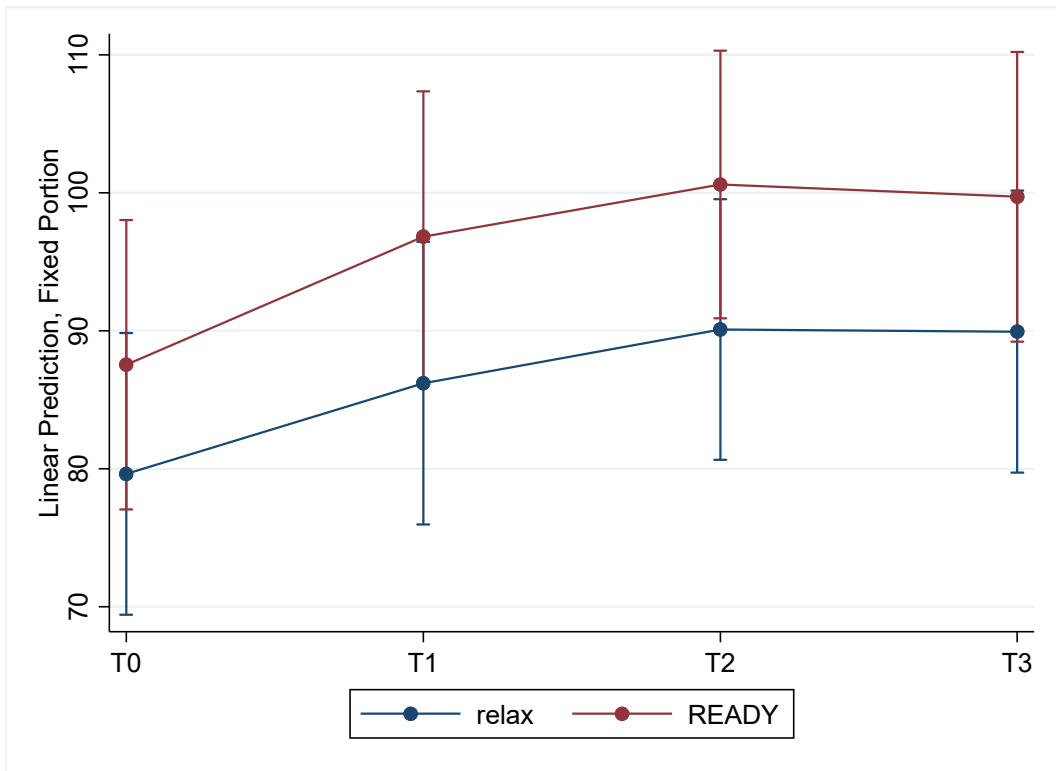

### CompACT - Openness to the experience

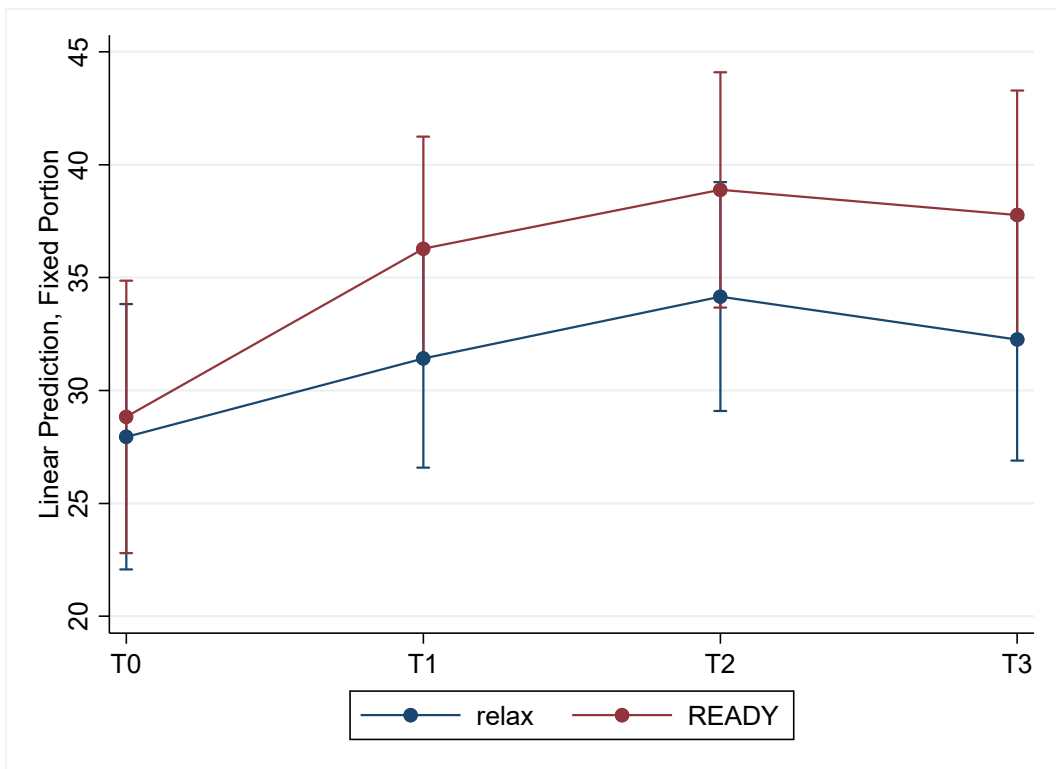

### CompACT- Behavioral awareness

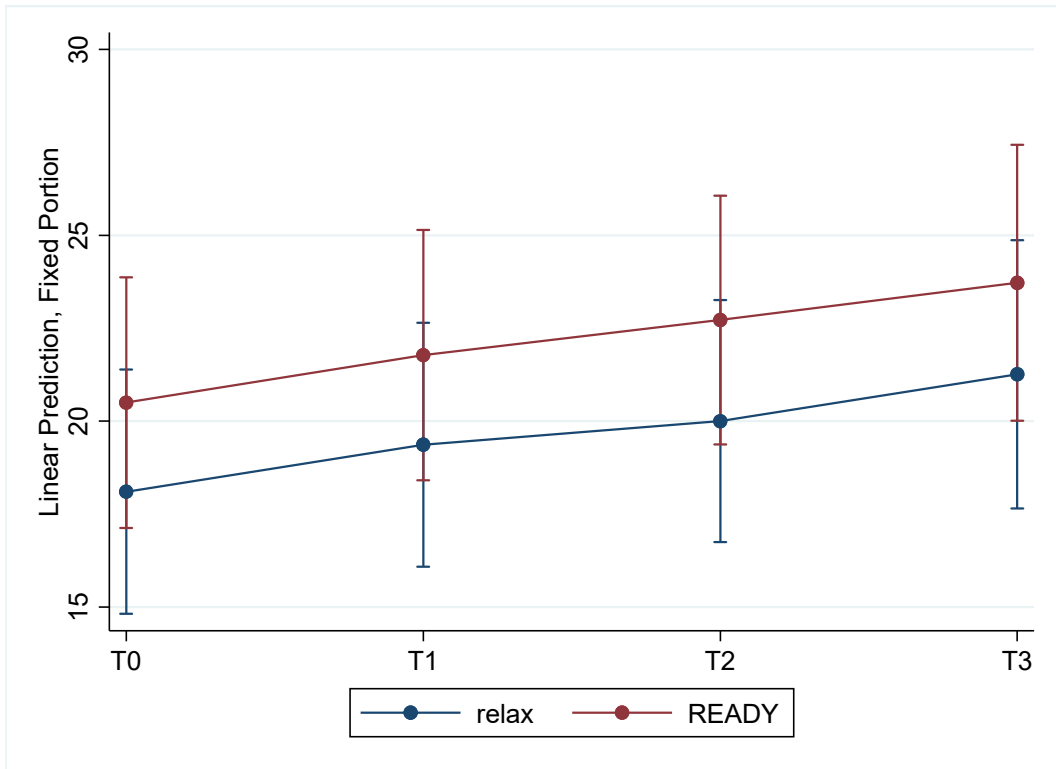

### CompACT – Valued action

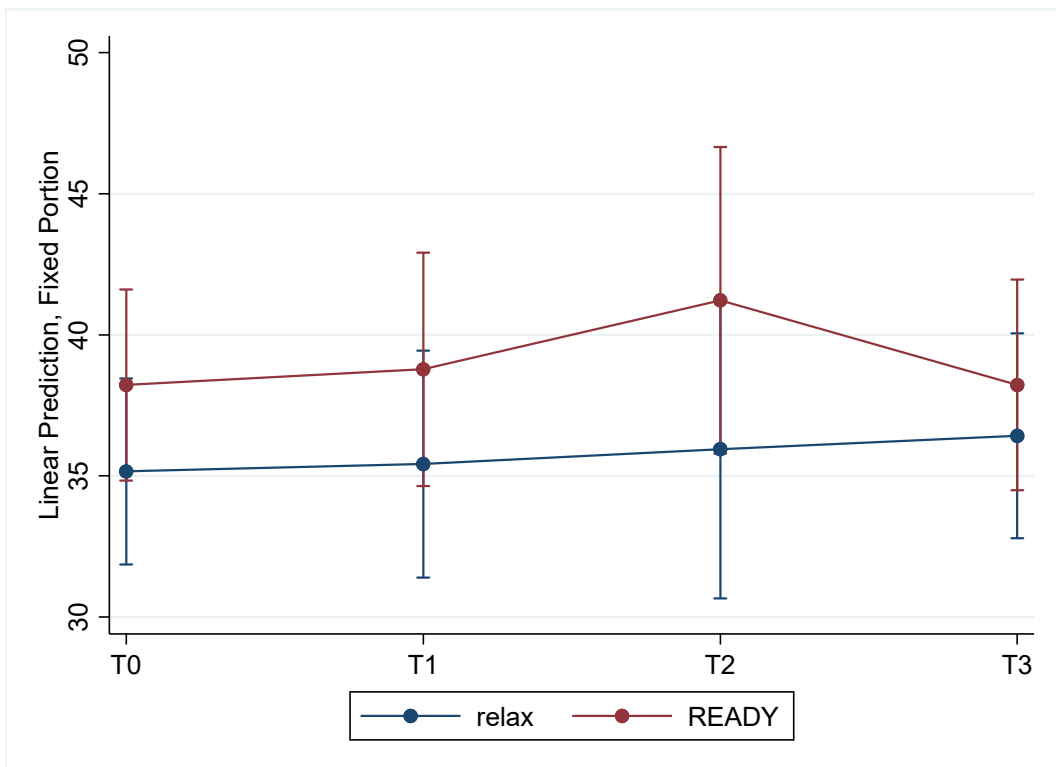

## MAAS

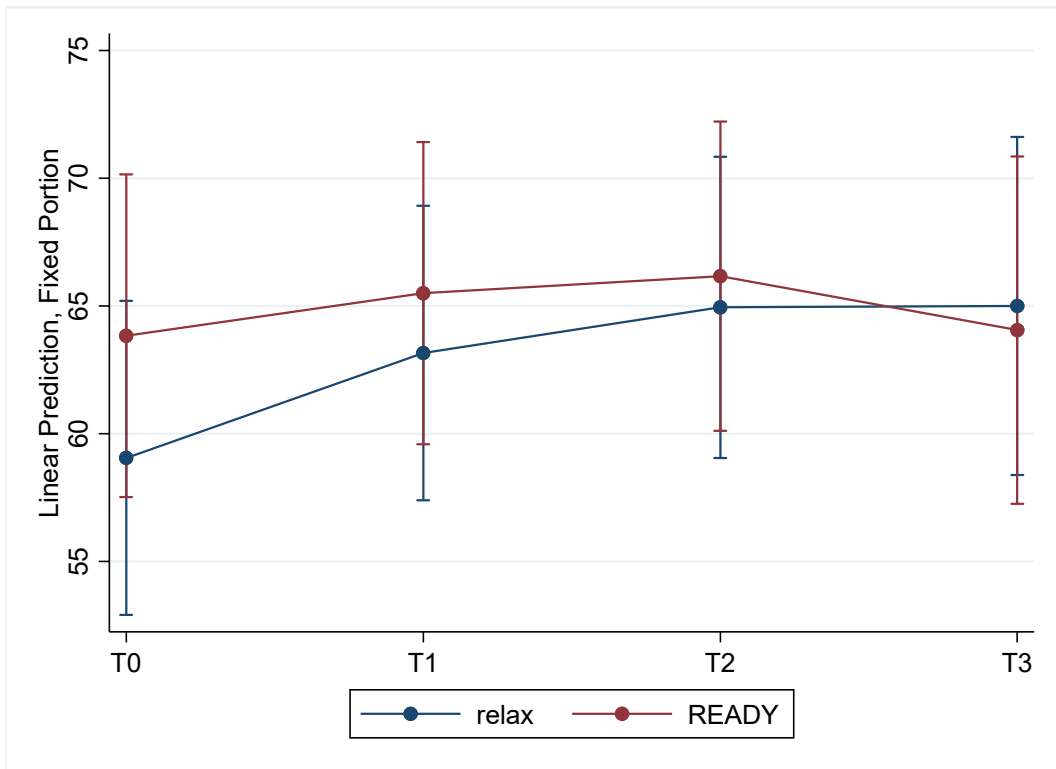

## AAQ II

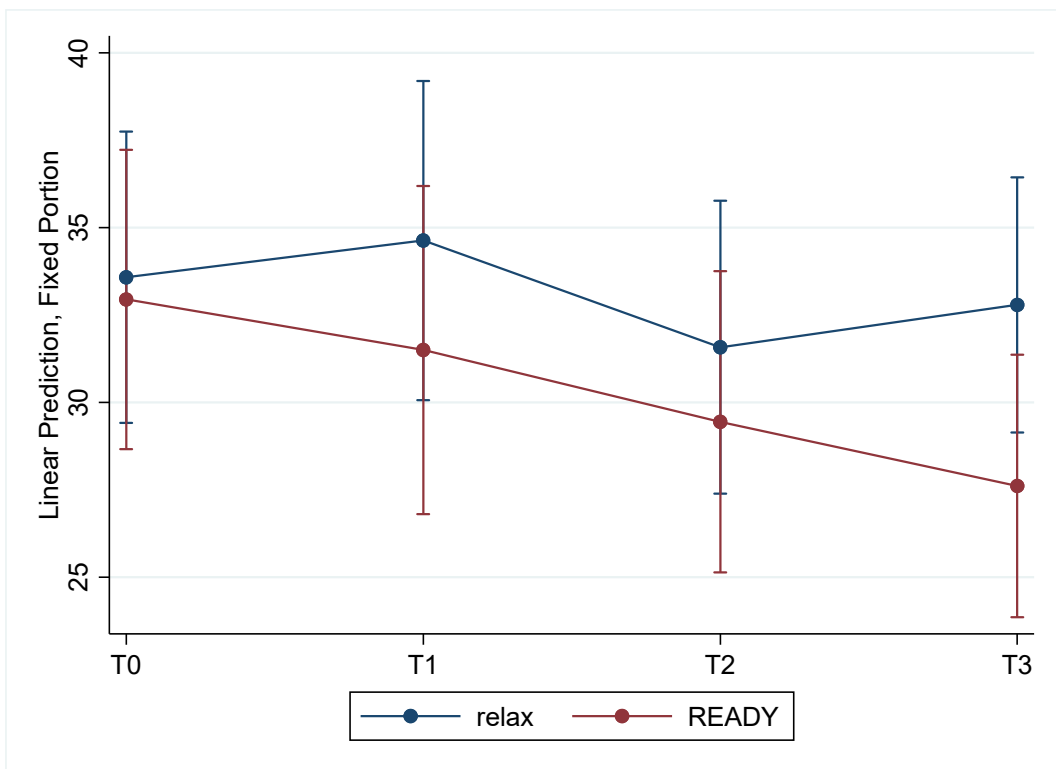

### VLQ Total Score

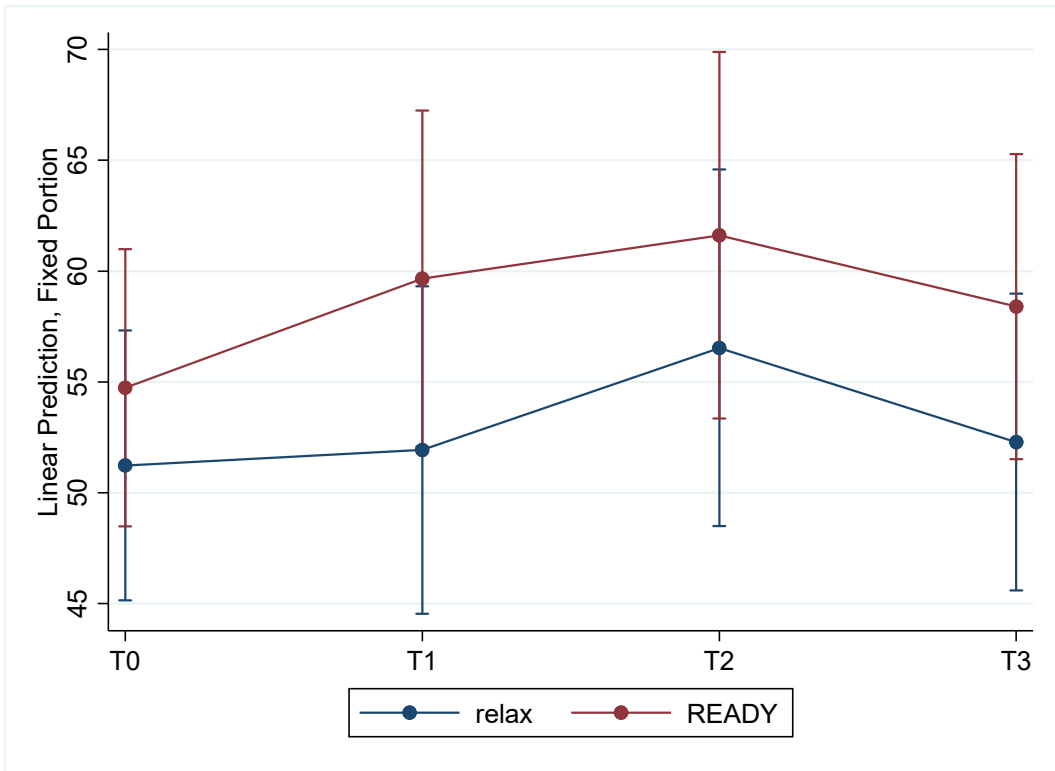

### VLQ Importance

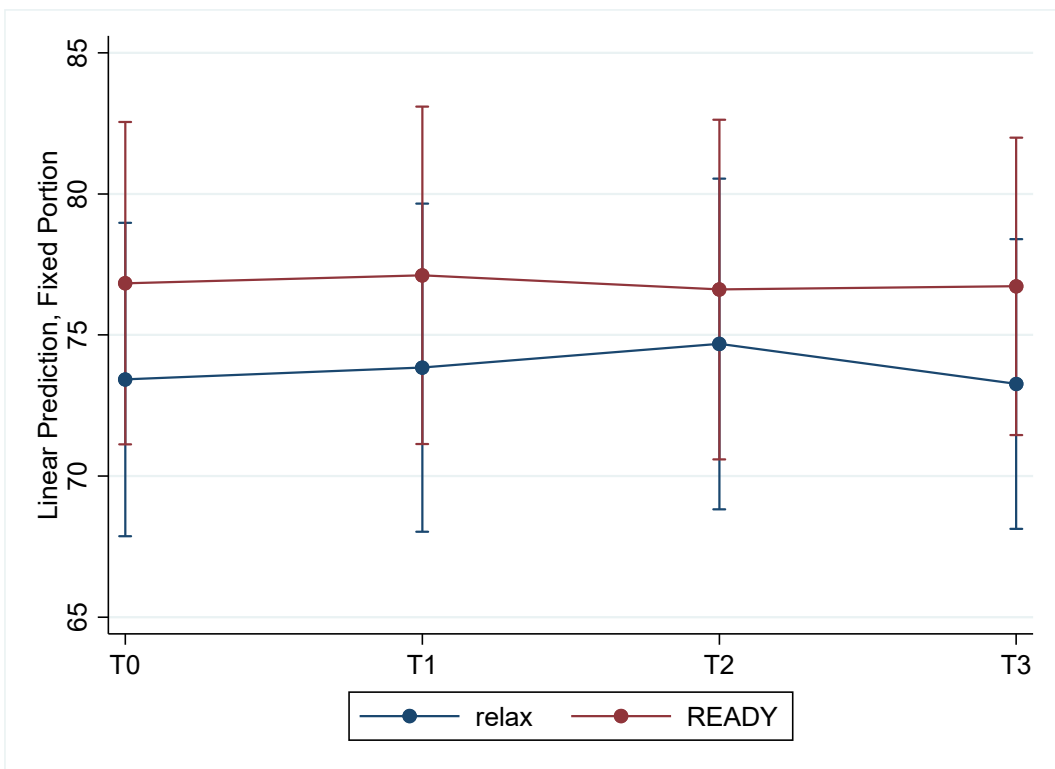

### VLQ Consistency

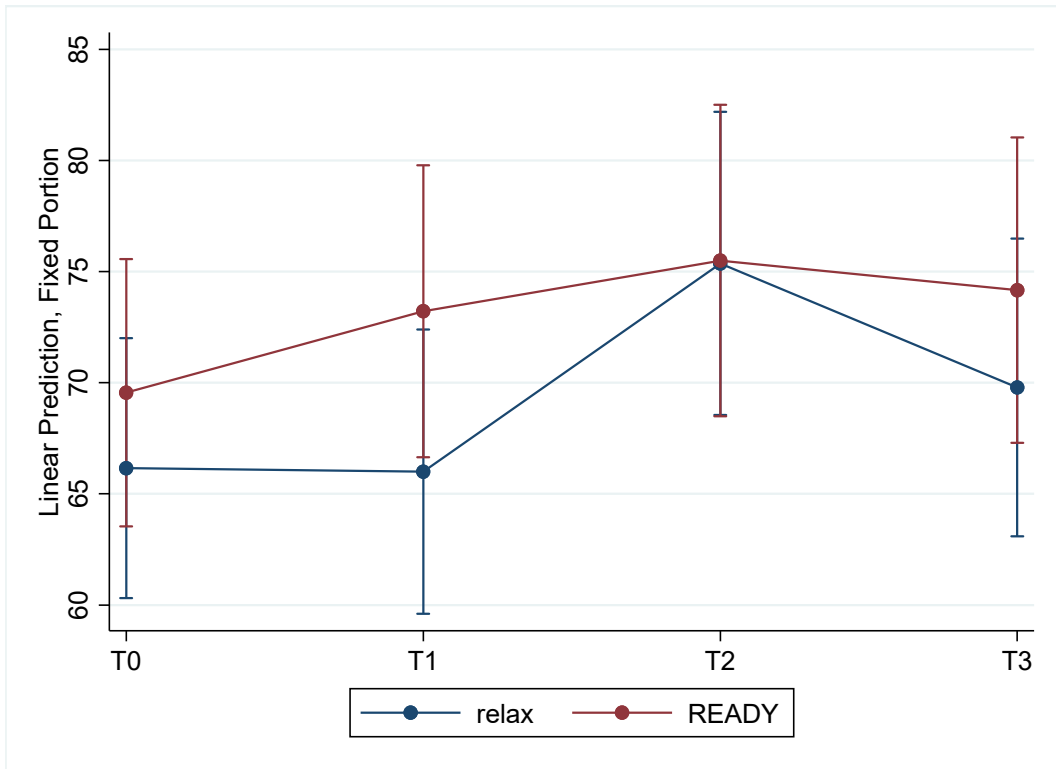

### DDS

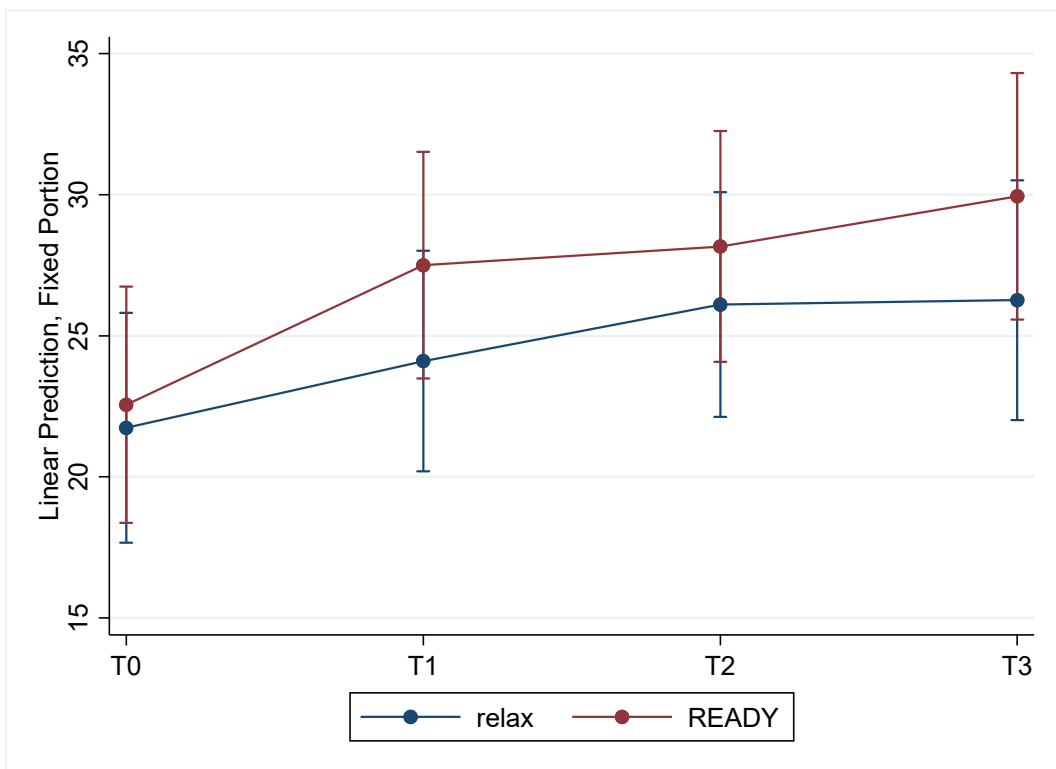



# SEIQOL-DW

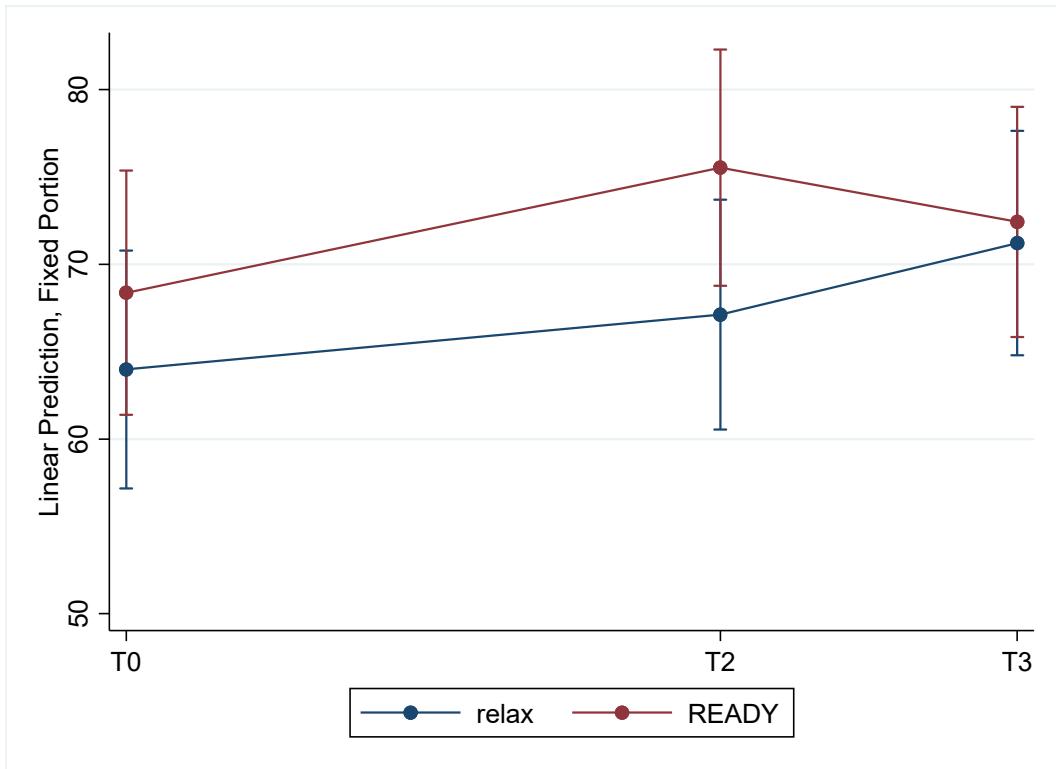

Supplement: pone.0231380.s006.pdf [file pone.0231380.s006.pdf]
