# Supplementary material for: A resilience group training program for people with multiple sclerosis: Results of a pilot single-blind randomized controlled trial and nested qualitative study
Source: PubMed Central journal article supplement (PMC7145197; doi:10.1371/journal.pone.0231380), 2020-04-09
Supplement: pone.0231380.s001.pdf [file pone.0231380.s001.pdf]

## S1 Appendix - CONSORT

### Checklist of information to include when reporting a pilot or feasibility trial

| Section/Topic             | Item No | Checklist item                                                                                                         | Reported on page No                                                     |
|---------------------------|---------|------------------------------------------------------------------------------------------------------------------------|-------------------------------------------------------------------------|
| <b>Title and abstract</b> |         |                                                                                                                        |                                                                         |
|                           | 1a      | Identification as a pilot or feasibility randomised trial in the title                                                 | Title page, p. 1                                                        |
|                           | 1b      | Structured summary of pilot trial design, methods, results, and conclusions                                            | Abstract p. 2,3                                                         |
| <b>Introduction</b>       |         |                                                                                                                        |                                                                         |
| Background and objectives | 2a      | Scientific background and explanation of rationale for future definitive trial, and reasons for randomised pilot trial | Introduction p. 4-7                                                     |
|                           | 2b      | Specific objectives or research questions for pilot trial                                                              | Introduction p. 6-7                                                     |
| <b>Methods</b>            |         |                                                                                                                        |                                                                         |
| Trial design              | 3a      | Description of pilot trial design (such as parallel, factorial) including allocation ratio                             | Materials and methods p. 7, and Recruitment and trial procedures p. 8,9 |
|                           | 3b      | Important changes to methods after pilot trial commencement (such as eligibility criteria), with reasons               | N/A                                                                     |
| Participants              | 4a      | Eligibility criteria for participants                                                                                  | Participant eligibility p. 8                                            |
|                           | 4b      | Settings and locations where the data were collected                                                                   | Material and Methods p. 8                                               |
|                           | 4c      | How participants were identified and consented                                                                         | Recruitment and trial procedures p. 8, 9.                               |

|                                  |     |                                                                                                                                                                                             |                                                                       |
|----------------------------------|-----|---------------------------------------------------------------------------------------------------------------------------------------------------------------------------------------------|-----------------------------------------------------------------------|
| Interventions                    | 5   | The interventions for each group with sufficient details to allow replication, including how and when they were actually administered                                                       | Intervention p. 9; Control condition p. 10                            |
| Outcomes                         | 6a  | Completely defined prespecified assessments or measurements to address each pilot trial objective specified in 2b, including how and when they were assessed                                | Material and Methods p. 7; Measures p. 10 – 13.                       |
|                                  | 6b  | Any changes to pilot trial assessments or measurements after the pilot trial commenced, with reasons                                                                                        | N/A                                                                   |
|                                  | 6c  | If applicable, prespecified criteria used to judge whether, or how, to proceed with future definitive trial                                                                                 |                                                                       |
| Sample size                      | 7a  | Rationale for numbers in the pilot trial                                                                                                                                                    | Sample size calculation p. 14; S4 Appendix – Sample size calculation. |
|                                  | 7b  | When applicable, explanation of any interim analyses and stopping guidelines                                                                                                                | N/A                                                                   |
| Randomisation:                   |     |                                                                                                                                                                                             |                                                                       |
| Sequence generation              | 8a  | Method used to generate the random allocation sequence                                                                                                                                      | Recruitment and trial procedures p. 8, 9.                             |
|                                  | 8b  | Type of randomisation(s); details of any restriction (such as blocking and block size)                                                                                                      | Recruitment and trial procedures p. 9.                                |
| Allocation concealment mechanism | 9   | Mechanism used to implement the random allocation sequence (such as sequentially numbered containers), describing any steps taken to conceal the sequence until interventions were assigned | Recruitment and trial procedures p. 9                                 |
| Implementation                   | 10  | Who generated the random allocation sequence, who enrolled participants, and who assigned participants to interventions                                                                     | Recruitment and trial procedures p. 8, 9.                             |
| Blinding                         | 11a | If done, who was blinded after assignment to interventions (for example, participants, care providers, those assessing                                                                      | Material and                                                          |

|                                                      |     |                                                                                                                                                                                       |                                                                                           |
|------------------------------------------------------|-----|---------------------------------------------------------------------------------------------------------------------------------------------------------------------------------------|-------------------------------------------------------------------------------------------|
|                                                      |     | outcomes) and how                                                                                                                                                                     | Methods p. 7                                                                              |
|                                                      | 11b | If relevant, description of the similarity of interventions                                                                                                                           | Discussion p.34                                                                           |
| Statistical methods                                  | 12  | Methods used to address each pilot trial objective whether qualitative or quantitative                                                                                                | Quantitative Analysis p. 14;<br>Qualitative approach p. 15.                               |
| <b>Results</b>                                       |     |                                                                                                                                                                                       |                                                                                           |
| Participant flow (a diagram is strongly recommended) | 13a | For each group, the numbers of participants who were approached and/or assessed for eligibility, randomly assigned, received intended treatment, and were assessed for each objective | Fig. 1 - CONSORT flowchart.                                                               |
|                                                      | 13b | For each group, losses and exclusions after randomisation, together with reasons                                                                                                      | Fig. 1 - CONSORT flowchart.;<br>Results/ RCT findings/participants characteristics p. 16. |
| Recruitment                                          | 14a | Dates defining the periods of recruitment and follow-up                                                                                                                               | Results/ RCT findings/participants characteristics p. 16.                                 |
|                                                      | 14b | Why the pilot trial ended or was stopped                                                                                                                                              | N/A                                                                                       |
| Baseline data                                        | 15  | A table showing baseline demographic and clinical characteristics for each group                                                                                                      | Table 1 and 2 p 16 – 18.                                                                  |
| Numbers analysed                                     | 16  | For each objective, number of participants (denominator) included in each analysis. If relevant, these numbers should be by randomised group                                          | We had no drop out. N= 37                                                                 |
| Outcomes and estimation                              | 17  | For each objective, results including expressions of uncertainty (such as 95% confidence interval) for any estimates. If relevant, these results should be by randomised group        | Efficacy results p. 17-19                                                                 |
| Ancillary analyses                                   | 18  | Results of any other analyses performed that could be used to inform the future definitive trial                                                                                      | Efficacy results                                                                          |

|                          |     |                                                                                                                                                     |                                                                                    |
|--------------------------|-----|-----------------------------------------------------------------------------------------------------------------------------------------------------|------------------------------------------------------------------------------------|
|                          |     |                                                                                                                                                     | p. 17-19.<br>S5 Appendix –<br>Graphic plots<br>for repeated<br>measure<br>analysis |
| Harms                    | 19  | All important harms or unintended effects in each group (for specific guidance see CONSORT for harms)                                               | N/A                                                                                |
|                          | 19a | If relevant, other important unintended consequences                                                                                                | N/A                                                                                |
| <b>Discussion</b>        |     |                                                                                                                                                     |                                                                                    |
| Limitations              | 20  | Pilot trial limitations, addressing sources of potential bias and remaining uncertainty about feasibility                                           | Discussion p.<br>33 - 37.                                                          |
| Generalisability         | 21  | Generalisability (applicability) of pilot trial methods and findings to future definitive trial and other studies                                   | Discussion p.<br>33 - 37.                                                          |
| Interpretation           | 22  | Interpretation consistent with pilot trial objectives and findings, balancing potential benefits and harms, and considering other relevant evidence | Discussion p.<br>33 - 37.                                                          |
|                          | 22a | Implications for progression from pilot to future definitive trial, including any proposed amendments                                               | Discussion p.<br>33 - 37.                                                          |
| <b>Other information</b> |     |                                                                                                                                                     |                                                                                    |
| Registration             | 23  | Registration number for pilot trial and name of trial registry                                                                                      | Materials and<br>methods p. 7:<br>ISRCTN<br>registration<br>number:<br>38971970    |
| Protocol                 | 24  | Where the pilot trial protocol can be accessed, if available                                                                                        | Materials and<br>methods p. 7;<br>ISRCTN<br>website                                |
| Funding                  | 25  | Sources of funding and other support (such as supply of drugs), role of funders                                                                     | Funding p. 38                                                                      |
|                          | 26  | Ethical approval or approval by research review committee, confirmed with reference number                                                          | Materials and<br>methods p. 8                                                      |
