# Supplementary material for: A resilience group training program for people with multiple sclerosis: Results of a pilot single-blind randomized controlled trial and nested qualitative study
Source: PubMed Central journal article supplement (PMC7145197; doi:10.1371/journal.pone.0231380), 2020-04-09
Supplement: pone.0231380.s002.pdf [file pone.0231380.s002.pdf]

## S2 Appendix - COREQ

### Consolidated criteria for reporting qualitative studies (COREQ): 32-item checklist

| No. Item                                       | Guide questions/description                                 | Reported on Page #                                                                                                                                                                                                                                      |
|------------------------------------------------|-------------------------------------------------------------|---------------------------------------------------------------------------------------------------------------------------------------------------------------------------------------------------------------------------------------------------------|
| <b>Domain 1: Research team and reflexivity</b> |                                                             |                                                                                                                                                                                                                                                         |
| <i>Personal Characteristics</i>                |                                                             |                                                                                                                                                                                                                                                         |
| 1. Inter viewer/facilitator                    | Which author/s conducted the inter view or focus group?     |                                                                                                                                                                                                                                                         |
| 2. Credentials                                 | What were the researcher's credentials? E.g. PhD, MD        | Rui Quintas: MSc                                                                                                                                                                                                                                        |
| 3. Occupation                                  | What was their occupation at the time of the study?         | Qualitative study participants and recruitment p. 14                                                                                                                                                                                                    |
| 4. Gender                                      | Was the researcher male or female?                          | Male                                                                                                                                                                                                                                                    |
| 5. Experience and training                     | What experience or training did the researcher have?        | Qualitative study participants and recruitment p. 14<br><br>He previously participated in a dedicated training for another project involving people with MS (ManTra project). He has already run PSIs and FGMs and performed qualitative data analysis. |
| <i>Relationship with participants</i>          |                                                             |                                                                                                                                                                                                                                                         |
| 6. Relationship established                    | Was a relationship established prior to study commencement? | The interviewer was not acquainted to the participants prior to study commencement. When the interviews were conducted, the interviewer had already met the participants during the longitudinal assessment.                                            |

|                                             |                                                                                                                                                          |                                                                                                                                 |
|---------------------------------------------|----------------------------------------------------------------------------------------------------------------------------------------------------------|---------------------------------------------------------------------------------------------------------------------------------|
| 7. Participant knowledge of the interviewer | What did the participants know about the researcher? e.g. personal goals, reasons for doing the research                                                 | Qualitative study participants and recruitment p. 14                                                                            |
| 8. Interviewer characteristics              | What characteristics were reported about the interviewer/facilitator? e.g. Bias, assumptions, reasons and interests in the research topic                | RQ was specifically dedicated to participants' assessment and interviews. He did not participate in any other study activities. |
| <b>Domain 2: study design</b>               |                                                                                                                                                          |                                                                                                                                 |
| <i>Theoretical framework</i>                |                                                                                                                                                          |                                                                                                                                 |
| 9. Methodological orientation and Theory    | What methodological orientation was stated to underpin the study? e.g. grounded theory, discourse analysis, ethnography, phenomenology, content analysis | Qualitative analysis p. 5                                                                                                       |
| <i>Participant selection</i>                |                                                                                                                                                          |                                                                                                                                 |
| 10. Sampling                                | How were participants selected? e.g. purposive, convenience, consecutive, snowball                                                                       | Qualitative study participants and recruitment p. 14                                                                            |
| 11. Method of approach                      | How were participants approached? e.g. face-to-face, telephone, mail, email                                                                              | Qualitative study participants and recruitment p. 14                                                                            |
| 12. Sample size                             | How many participants were in the study?                                                                                                                 | Nested qualitative study results p.14                                                                                           |
| 13. Non-participation                       | How many people refused to participate or dropped out? Reasons?                                                                                          | Nested qualitative study results p.14                                                                                           |
| <i>Setting</i>                              |                                                                                                                                                          |                                                                                                                                 |
| 14. Setting of data collection              | Where was the data collected? e.g. home, clinic, workplace                                                                                               | Qualitative study participants and recruitment p. 14                                                                            |
| 15. Presence of non-participants            | Was anyone else present besides the participants and researchers?                                                                                        | No                                                                                                                              |
| 16. Description of sample                   | What are the important characteristics of the sample? e.g. demographic data, date                                                                        | The demographic and clinical characteristics of the sample are individually presented in S6 Appendix.                           |
| <i>Data collection</i>                      |                                                                                                                                                          |                                                                                                                                 |

|                                        |                                                                                                                                 |                                                                                                              |
|----------------------------------------|---------------------------------------------------------------------------------------------------------------------------------|--------------------------------------------------------------------------------------------------------------|
| 17. Interview guide                    | Were questions, prompts, guides provided by the authors? Was it pilot tested?                                                   | Nested qualitative study p. 13, 14. S3 Appendix.                                                             |
| 18. Repeat interviews                  | Were repeat inter views carried out? If yes, how many?                                                                          | Nested qualitative study p. 13, 14.                                                                          |
| 19. Audio/visual recording             | Did the research use audio or visual recording to collect the data?                                                             | Nested qualitative study p. 13, 14.                                                                          |
| 20. Field notes                        | Were field notes made during and/or after the inter view or focus group?                                                        | Nested qualitative study p. 13, 14.                                                                          |
| 21. Duration                           | What was the duration of the inter views or focus group?                                                                        | Nested qualitative study p. 13, 14.                                                                          |
| 22. Data saturation                    | Was data saturation discussed?                                                                                                  | No, we decided to interview all the participants.                                                            |
| 23. Transcripts returned               | Were transcripts returned to participants for comment and/or correction?                                                        | No. The interviewer check the key points of the interview with each participant at the end of the interview. |
| <b>Domain 3: analysis and findings</b> |                                                                                                                                 |                                                                                                              |
| <i>Data analysis</i>                   |                                                                                                                                 |                                                                                                              |
| 24. Number of data coders              | How many data coders coded the data?                                                                                            | Qualitative analysis p. 15.                                                                                  |
| 25. Description of the coding tree     | Did authors provide a description of the coding tree?                                                                           | Qualitative analysis p. 15. S6 Appendix.                                                                     |
| 26. Derivation of themes               | Were themes identified in advance or derived from the data?                                                                     | Qualitative analysis p. 15.                                                                                  |
| 27. Software                           | What software, if applicable, was used to manage the data?                                                                      | We did not use any software.                                                                                 |
| 28. Participant checking               | Did participants provide feedback on the findings?                                                                              | No.                                                                                                          |
| <i>Reporting</i>                       |                                                                                                                                 |                                                                                                              |
| 29. Quotations presented               | Were participant quotations presented to illustrate the themes/findings? Was each quotation identified? e.g. participant number | Nested qualitative study results p. 19 – 32. S6 Appendix.                                                    |
| 30. Data and findings consistent       | Was there consistency between the data presented and the findings?                                                              | Yes                                                                                                          |
| 31. Clarity of major themes            | Were major themes clearly presented in the findings?                                                                            | Yes                                                                                                          |
| 32. Clarity of minor themes            | Is there a description of diverse cases or discussion of minor themes?                                                          | Yes.                                                                                                         |
