# Supplementary material for: A resilience group training program for people with multiple sclerosis: Results of a pilot single-blind randomized controlled trial and nested qualitative study
Source: PubMed Central journal article supplement (PMC7145197; doi:10.1371/journal.pone.0231380), 2020-04-09
Supplement: pone.0231380.s005.pdf [file pone.0231380.s005.pdf]

## S5 Appendix - Sample size calculation

|                                                              |
|--------------------------------------------------------------|
| Estimated sample size for two samples with repeated measures |
| Assumptions:                                                 |
| alpha = 0.0500 (two-sided)                                   |
| power = 0.8000                                               |
| m1 = 56                                                      |
| m2 = 70                                                      |
| sd1 = 22                                                     |
| sd2 = 22                                                     |
| n2/n1 = 1.00                                                 |
| number of follow-up measurements = 3                         |
| correlation between follow-up measurements = 0.750           |
| number of baseline measurements = 1                          |
| correlation between baseline & follow-up = 0.750             |

|                             |
|-----------------------------|
| Method: CHANGE              |
| relative efficiency = 3.000 |
| adjustment to sd = 0.577    |
| adjusted sd1 = 12.702       |
| adjusted sd2 = 12.702       |

|                                  |
|----------------------------------|
| Estimated required sample sizes: |
| n1 = 15                          |
| n2 = 15                          |
